# Supplementary material for: Hydrogen production by NH3 decomposition at low temperatures assisted by surface protonics
Source: Royal Society of Chemistry journal article supplement (doi:10.1039/d4sc04790g), 2024-01-01
Supplement: d4sc04790g1.pdf [file d4sc04790g1.pdf]

## ESI (Supporting Information)

### Low-temperature NH<sub>3</sub> decomposition assisted by surface protonics

Yukino Ofuchi<sup>#a</sup>, Kenta Mitarai<sup>#b</sup>, Sae Doi<sup>#a</sup>, Koki Saegusa<sup>a</sup>, Mio Hayashi<sup>a</sup>, Hiroshi Sampei<sup>a</sup>, Takuma Higo<sup>a</sup>, Jeong Gil Seo<sup>\*c</sup> and Yasushi Sekine<sup>\*a</sup>

- a. Department of Applied Chemistry, Waseda University, 3-4-1, Okubo, Shinjuku, Tokyo, 169-8555, Japan, E-mail: ysekine@waseda.jp
- b. Research & Development Center, Yanmar Holdings, 2481, Umegahara, Maibara, Shiga, 521-8511, Japan
- c. Department of Chemical Engineering, Hanyang University, 222 Wangsimri-ro, Seongdong-gu, Seoul 04763, Republic of Korea. E-mail: jgseo@hanyang.ac.kr

\*Corresponding authors

#### Catalyst preparation

CeO<sub>2</sub> (JRC-CEO-1) was used as a catalyst support. Active metal (Ru, Fe, Ni, Co; 8.2 mol%) was loaded over the CeO<sub>2</sub> using an impregnation method. These catalysts have equimolar metal sites. (i.e. 5.0wt%Ru/CeO<sub>2</sub>, 2.8wt%Fe/CeO<sub>2</sub>, 3.0wt%Co/CeO<sub>2</sub>, 3.0wt%Ni/CeO<sub>2</sub>). In kinetic consideration such as partial pressure change tests and temperature dependence, 0.85 mol% (=0.5wt%) Ru/CeO<sub>2</sub> was used to reduce ammonia conversion below 10%. Tris(acetylacetonate)ruthenium(III) (Ru(acac)<sub>3</sub>, Tanaka Holdings Co., Ltd.), Fe(NO<sub>3</sub>)<sub>3</sub>·9H<sub>2</sub>O, Co(NO<sub>3</sub>)<sub>2</sub>·6H<sub>2</sub>O, and Ni(NO<sub>3</sub>)<sub>2</sub>·6H<sub>2</sub>O (Kanto Chemical Co. Inc.) were used as metal precursors. After CeO<sub>2</sub> powder and each precursor were dissolved in distilled water (Fe, Co, Ni) or acetone (Ru), the slurry was stirred at room temperature for 2 h. The obtained slurry was evaporated at 300°C (Fe, Co, Ni) or 100°C (Ru) and dried at 120°C. The obtained powder was calcined at 450°C for 2 h (Fe, Co, Ni) or reduced at 450°C for 2 h (Ru) in the stream of Ar:H<sub>2</sub>=1:1 at 100 SCCM. The synthesized catalyst was molded into 355–500 μm particles.

#### Current changing test

The effect of changing the current value on the activity was investigated using 8.2 mol%Ru/CeO<sub>2</sub>. The current value was varied from 1 to 20 mA. The current density was increased from 0.035–0.71 mA mm<sup>-2</sup>. The catalyst weight was 100 mg and the gas flow rate was 50 SCCM. Before the test the same pretreatment as for the activity test was performed. The catalyst bed temperature was adjusted to be approximately 125°C regardless of the change in current value.

#### Partial pressure changing test

The change in reaction order during applying an electric field or in thermo-catalysis was confirmed by partial pressure change tests. 5%NH<sub>3</sub>/Ar, 5%H<sub>2</sub>/Ar, N<sub>2</sub>, and Ar gases were used, respectively, and the partial pressure was changed so that the total gas flow rate was 100 SCCM. We used 0.85 mol%Ru/CeO<sub>2</sub> catalyst and before the test the same pretreatment as for the activity test was performed.

H<sub>2</sub> dependence: 5%H<sub>2</sub>/Ar=10, 20, 30, 40, 50 SCCM, balance: 5%NH<sub>3</sub>/Ar

NH<sub>3</sub> dependence: 5%NH<sub>3</sub>/Ar=50, 60, 80, 100 SCCM, balance: Ar

N<sub>2</sub> dependence: 100%N<sub>2</sub>=7, 13, 20, 30 SCCM, balance: 5%NH<sub>3</sub>/Ar

#### ND<sub>3</sub> isotope exchange test

In this test 0.85 mol%Ru/CeO<sub>2</sub> was used and the catalyst weight was 200 mg. The inlet gas was 5%NH<sub>3</sub>/Ar or 5%ND<sub>3</sub>/Ar and the flow rate was 50 SCCM. The ammonia conversion was calculated from the amount of nitrogen produced.

#### AC impedance measurements

The comparison of conductivity of the CeO<sub>2</sub>(JRC-CEO-1) under Ar, 5%H<sub>2</sub>/Ar and 5%NH<sub>3</sub>/Ar was investigated. CeO<sub>2</sub> was ball-milled (300 rpm, 30 min) and then about 1 g of CeO<sub>2</sub> was pressed into pellets under the condition of 60 kN for 2 h. The pellets were calcined at 800°C, 2 h, 5°C min<sup>-1</sup> and sputtered with about 100 nm of Pt to form an electrode. The relative density of the samples was about 60%. In the measurements, the samples were pretreated in an Ar atmosphere at 500°C until a steady-state condition was reached, and then the gas flow rate was set to 30 SCCM at 200°C. The frequency of the measurement was 106-120 Hz. The measurement frequency was 10<sup>6</sup>-10<sup>3</sup> Hz and the voltage amplitude was 1.5 V rms. Fitting was performed with an RQ parallel circuit.

#### GHSV change test

The activity test was performed by altering the SV (space velocity). As the catalyst, 300 mg of 8.2 mol% Ru/CeO<sub>2</sub> was used, and the catalyst layer height was 0.66 cm. The imposed current was 6.0 mA, and the response voltage was about 0.32 kV for all tests. The catalyst bed temperature was adjusted to be about 125°C regardless of the change in SV.

#### Low-temperature adsorbed species trap test

To examine the proton content, the catalyst adsorbed species during the reaction were trapped at low temperatures, and then the temperature was increased, and the desorption peak was observed. First, the ammonia decomposition reaction was conducted until steady state using 0.3 g of 8.2 mol% Ru/CeO<sub>2</sub>. The reaction gas was 50 SCCM 5%NH<sub>3</sub>/Ar. The temperature was set at 373 K with EF and 573 K without EF. For Q-MASS sensitivity, the H<sub>2</sub>/N<sub>2</sub> ratio at steady state of the reaction was set to 3. Then, 5% NH<sub>3</sub>/Ar was switched to Ar and quenched to about 250 K. After the gas in the flow path was replaced by Ar, the temperature was gradually increased and the exit gas was observed by Q-MASS.

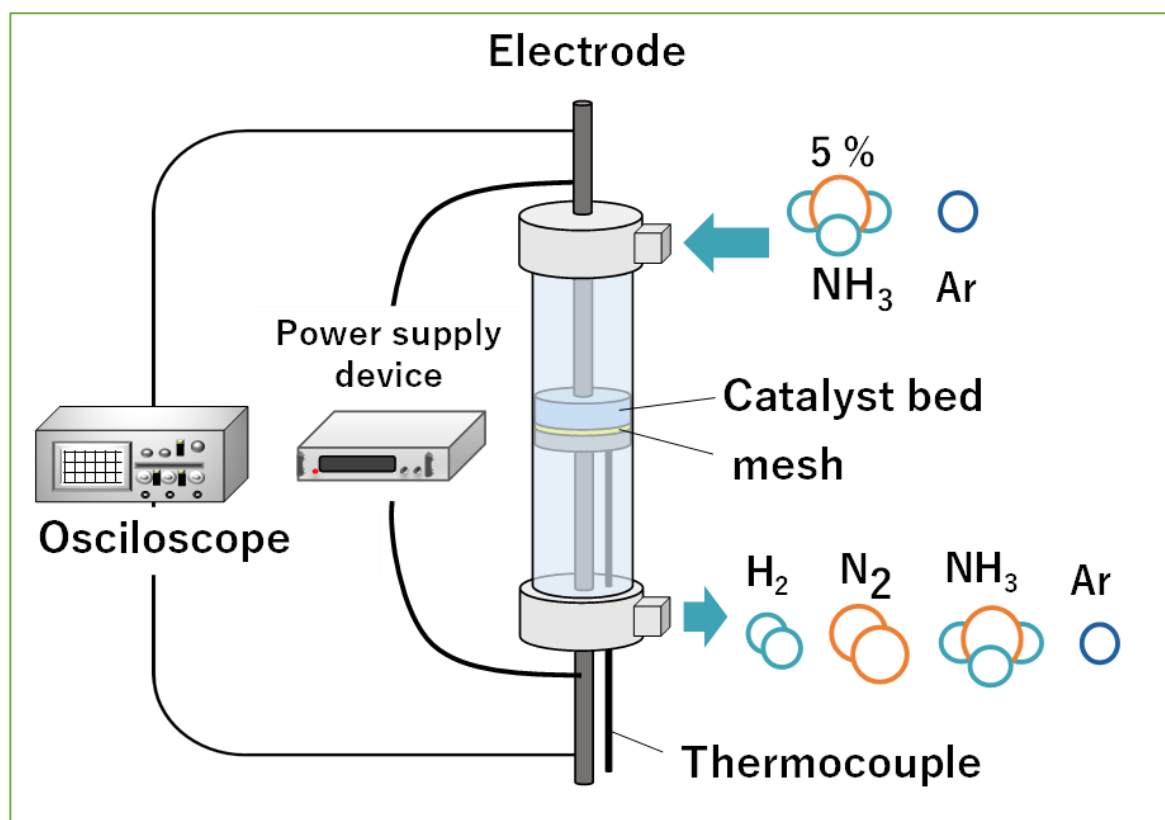

Fig. S1 Schematic image of a reactor for the activity test in the electric field.

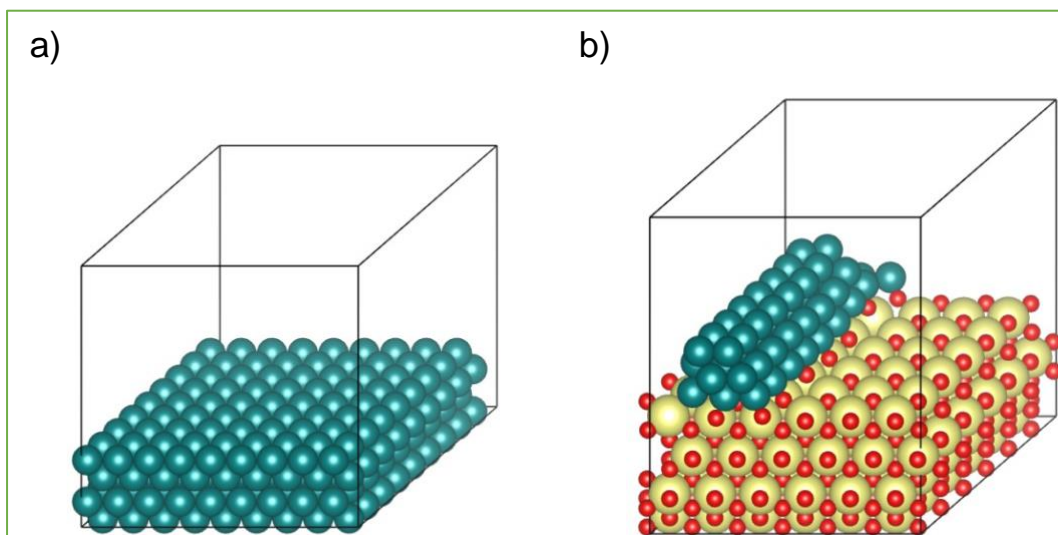

Fig. S2 Calculation model of (a) Ru surface and (b) Ru-CeO<sub>2</sub> interface. Ru, Ce, and O atoms are shown in green, yellow, and red, respectively.

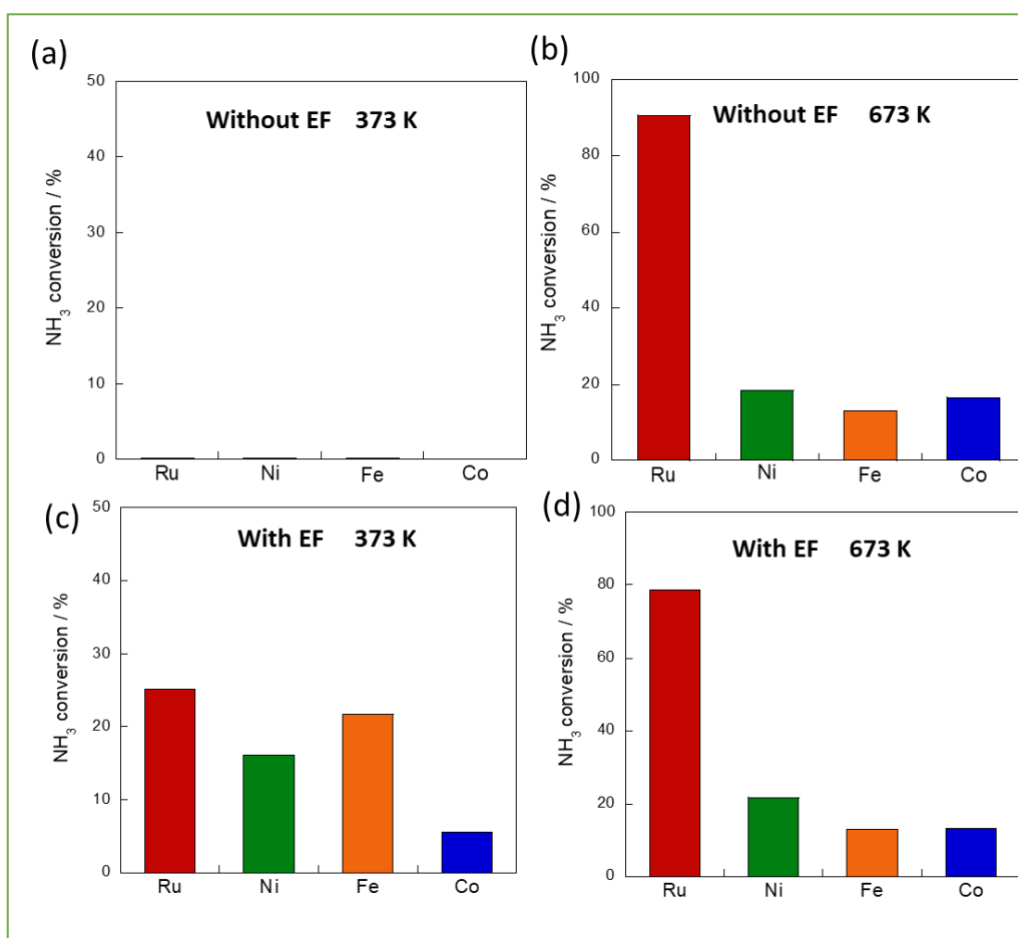

Fig. S3 Temperature dependence of NH<sub>3</sub> decomposition on catalysts with equimolar (i.e. 8.2 mol%) metal sites with and without an electric field. 5%NH<sub>3</sub>/Ar = 50 SCCM, 100 mg cat, 0.1 MPa, 0 or 6.0 mA; (a) without EF at 373 K, (b) without EF at 673 K, (c) with EF at 373 K, and (d) with EF at 673 K.

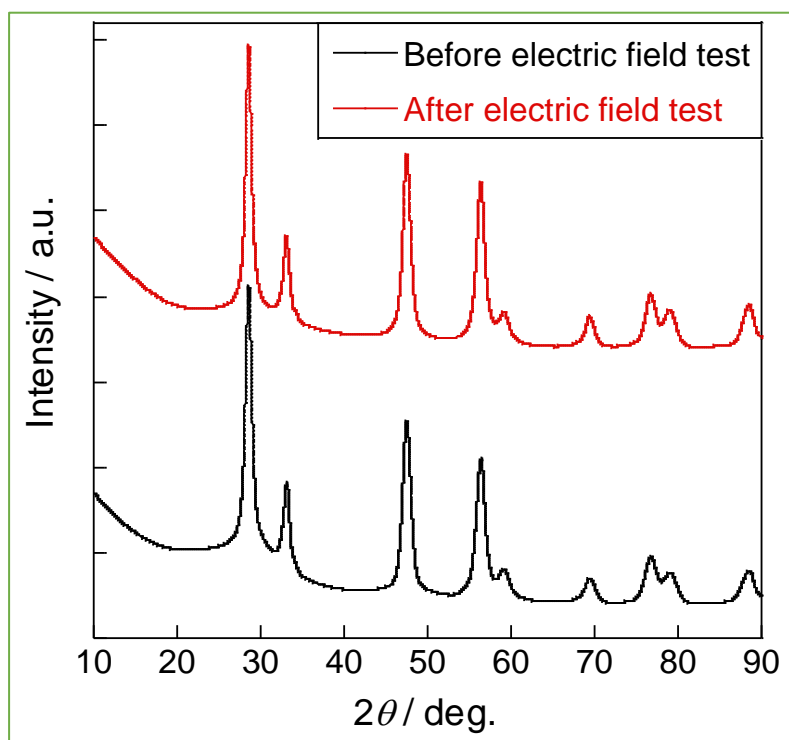

Fig. S4 XRD measurement before and after electric field tests over 8.2 mol% Ru/CeO<sub>2</sub>. 5%NH<sub>3</sub>/Ar = 50 SCCM, 100 mg cat, 0.1 MPa, 6.0 mA.

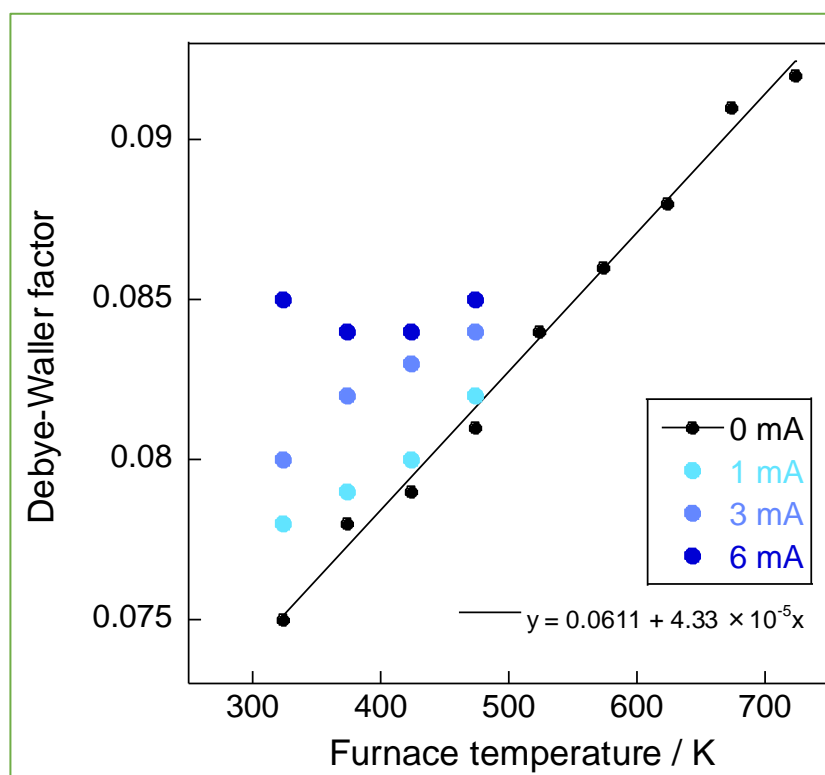

Fig. S5 Debye-Waller factor obtained from *in situ* XAFS measurements over 8.2 mol%Ru/CeO<sub>2</sub>. 5%NH<sub>3</sub>/Ar = 50 SCCM, 160 mg cat, 0.1 MPa, 0, 1, 3, 6.0 mA.

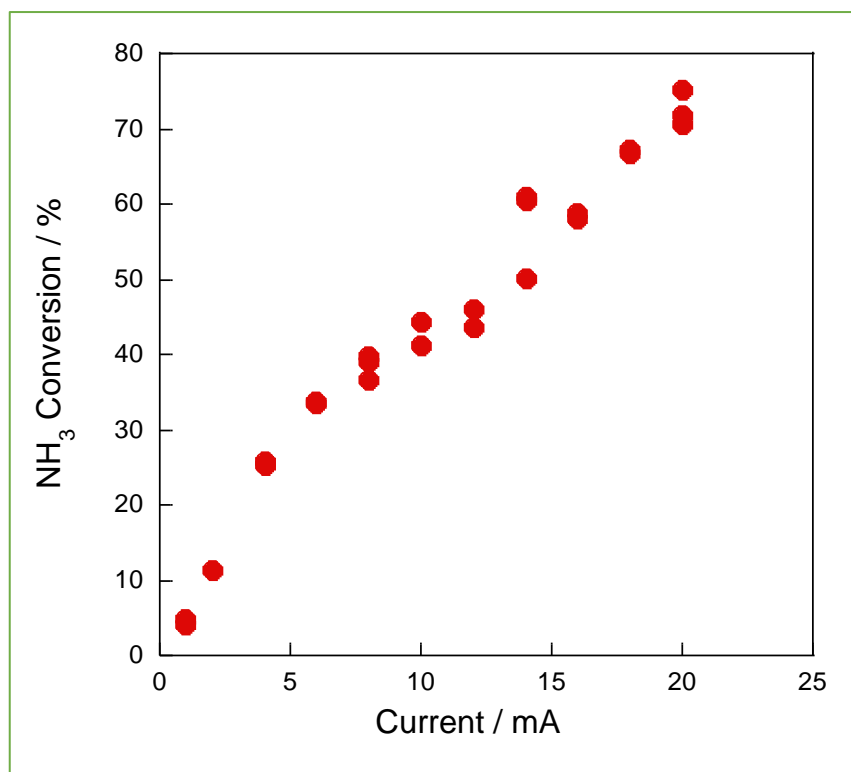

Fig. S6 The current dependence of NH<sub>3</sub> decomposition rate over 8.2 mol%Ru/CeO<sub>2</sub>; 5%NH<sub>3</sub>/Ar = 50 SCCM, 300 mg cat, 0.1 MPa, 398 K.

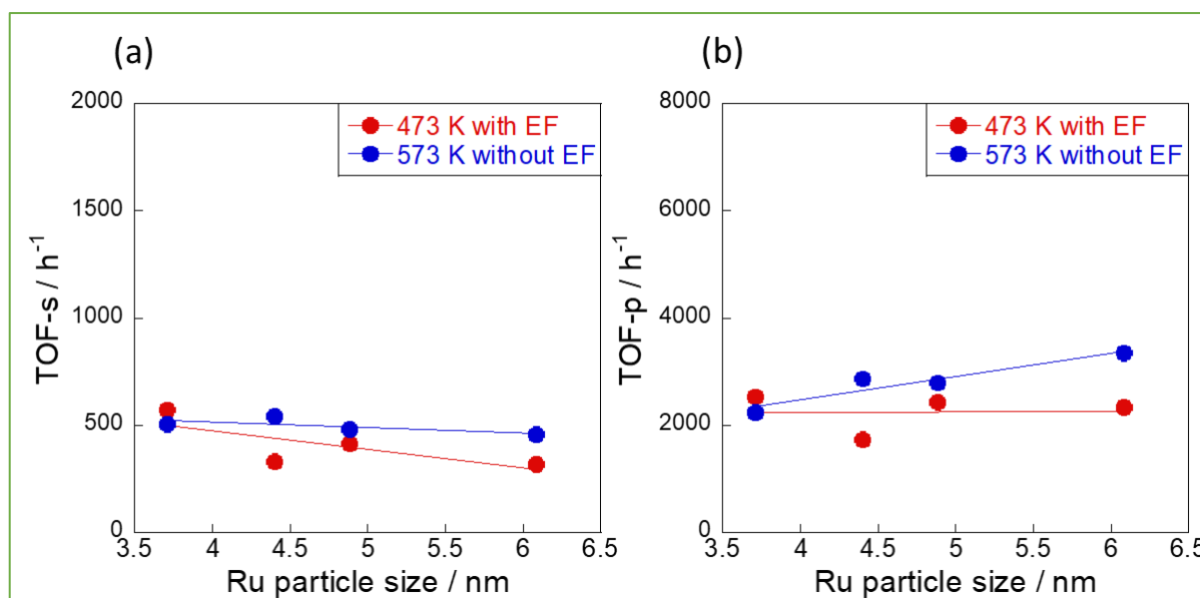

Fig. S7 Amount of H<sub>2</sub> molecules produced per number of Ru atoms (a) present on the surface (TOF-s) and (b) at the Ru-CeO<sub>2</sub> interface (TOF-p) over 0.85, 5.0, and 8.2 mol% Ru/CeO<sub>2</sub>; 5%NH<sub>3</sub>/Ar = 50 SCCM, 100 mg cat, 0.1 MPa, 0 or 6 mA.

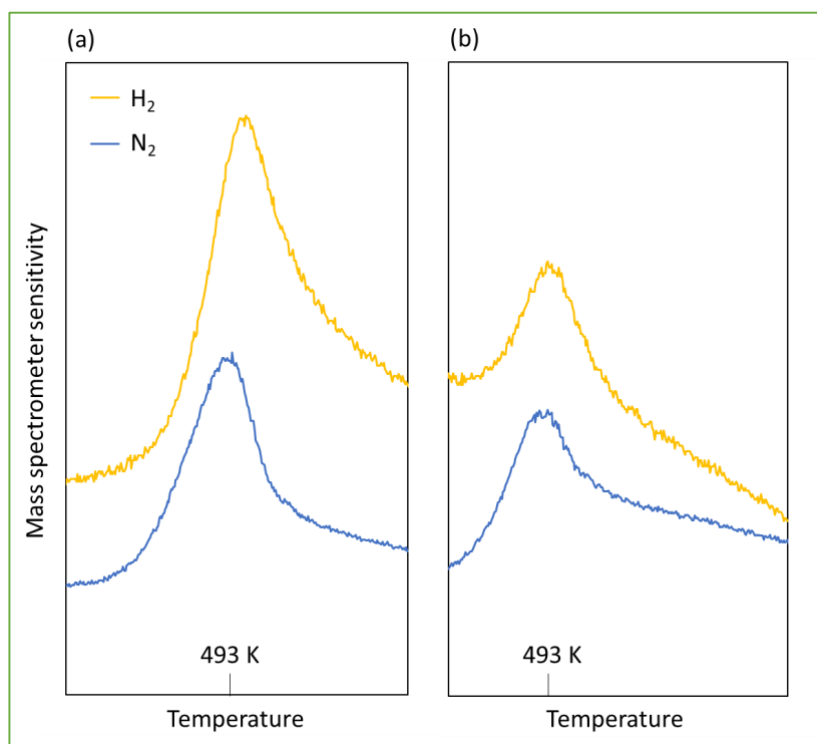

Fig. S8 Desorption peak of hydrogen and nitrogen adsorbed on 8.2 mol% Ru/CeO<sub>2</sub> during the ammonia decomposition reaction; (a) with EF at 373 K, (b) without EF at 573 K.

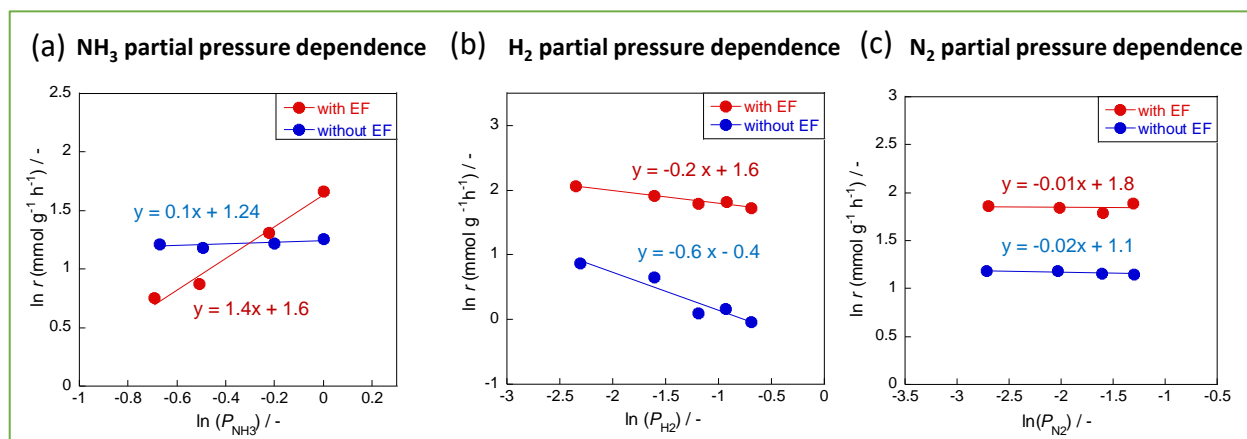

Fig. S9 The effect of partial pressure on the reaction rate; (a) for the partial pressure of NH<sub>3</sub>, (b) for the partial pressure of H<sub>2</sub>, (c) for the partial pressure of N<sub>2</sub>.

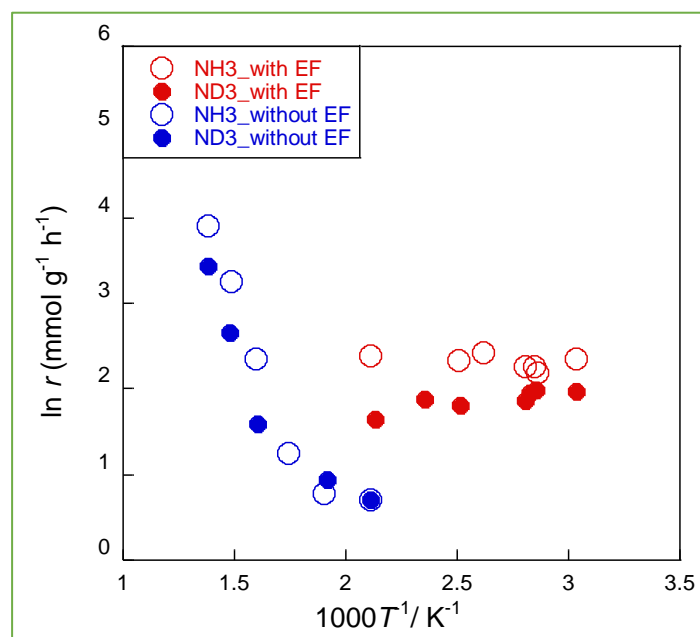

Fig. S10  $\text{NH}_3$  and  $\text{ND}_3$  decomposition reactions over 0.85 mol%Ru/ $\text{CeO}_2$  catalyst.

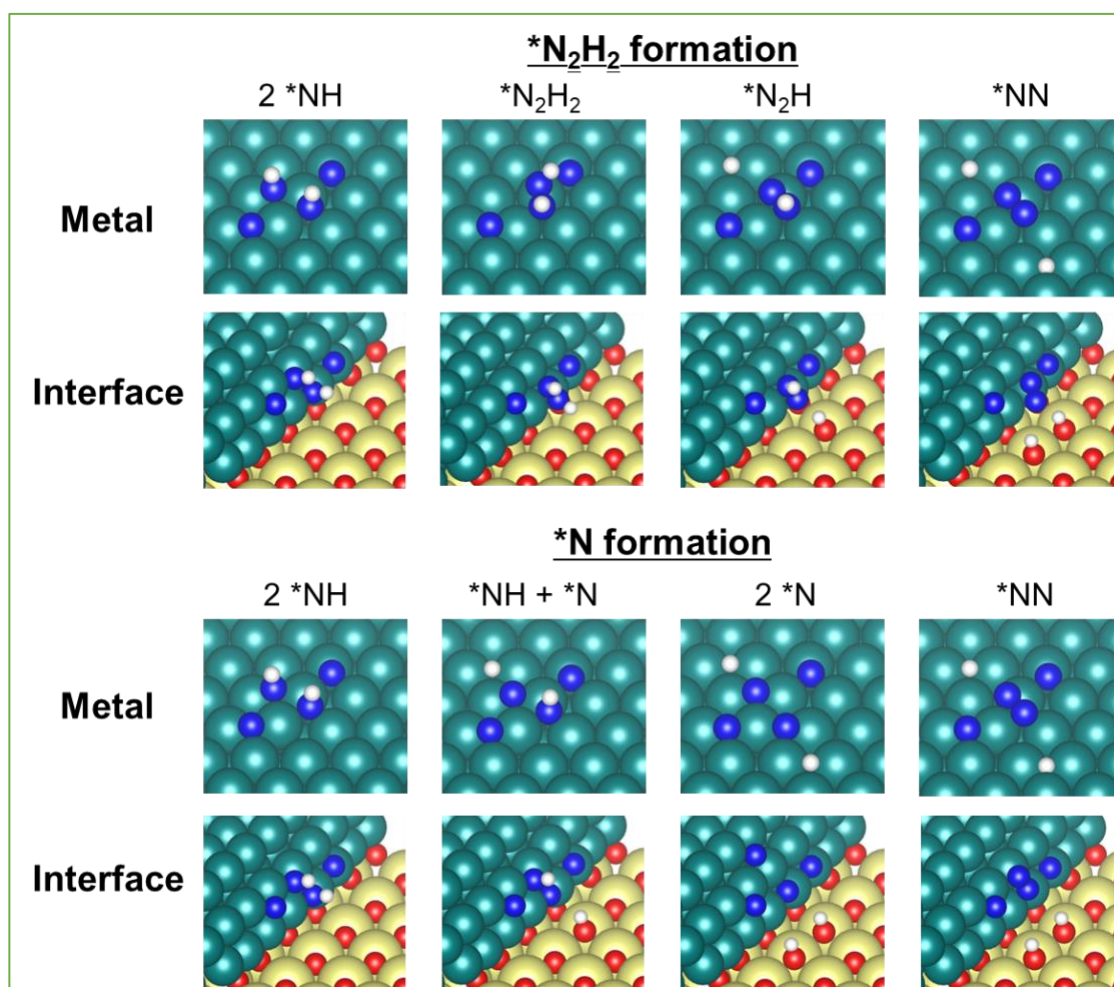

Fig. S11 Calculation model of each elementary step on N-terminate model.

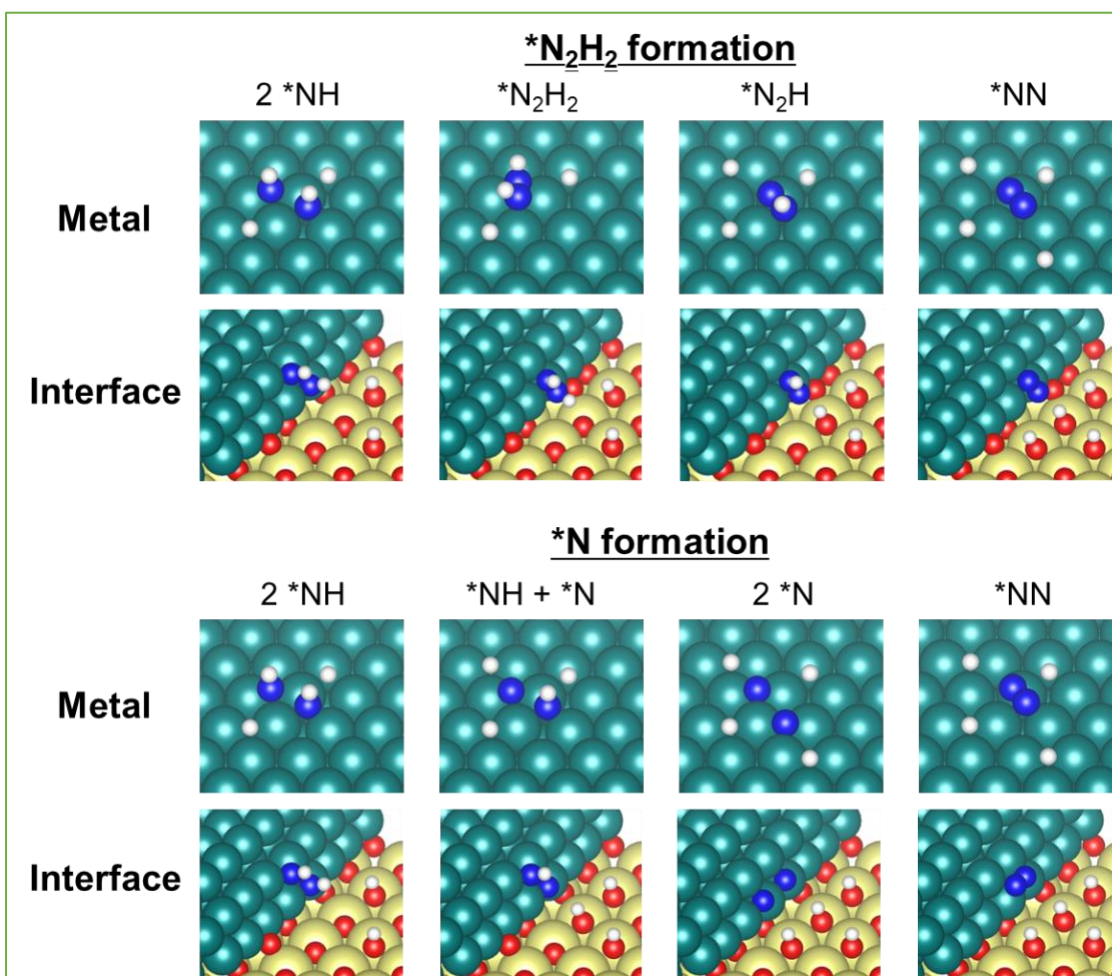

Fig. S12 Calculation model of each elementary step on H-terminate model.

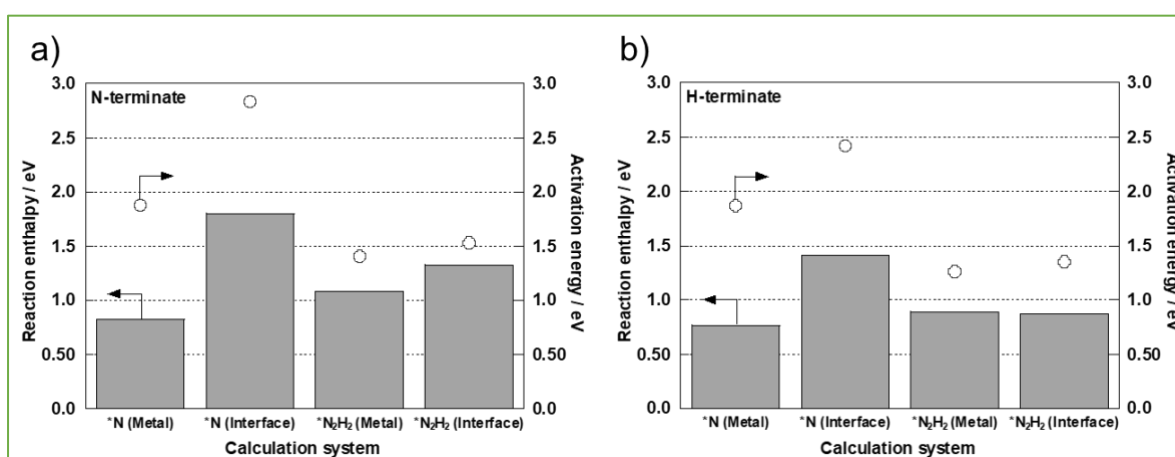

Fig. S13 Reaction enthalpy and activation energy of rate-determining step on each mechanism using (a) N-terminate model and (b) H-terminate model.



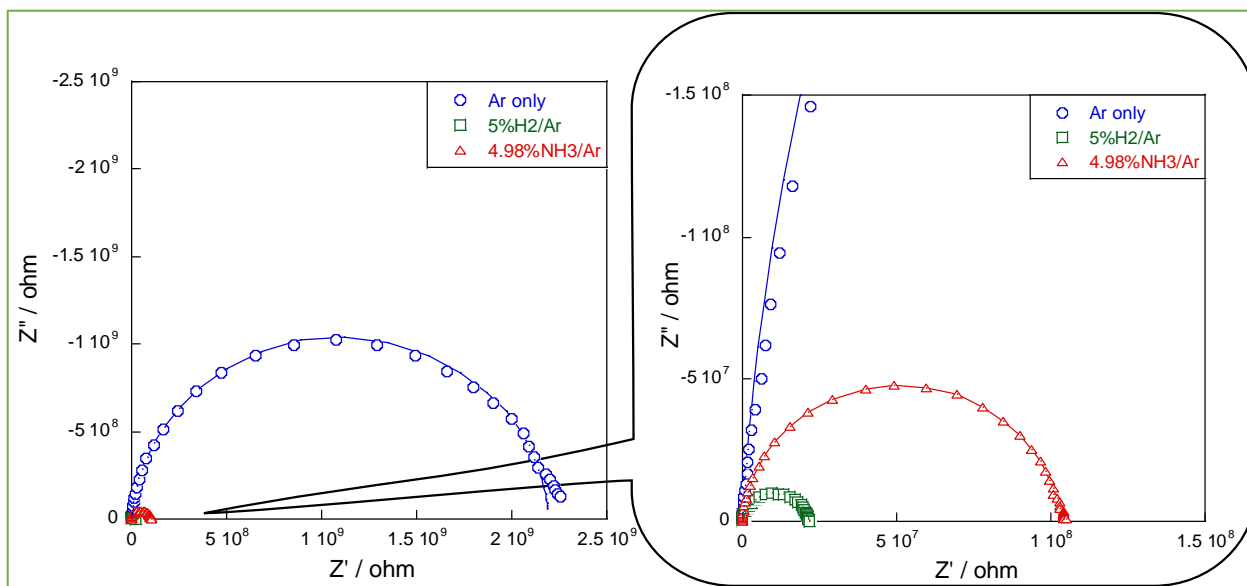

Fig. S14 The results of AC impedance measurements.

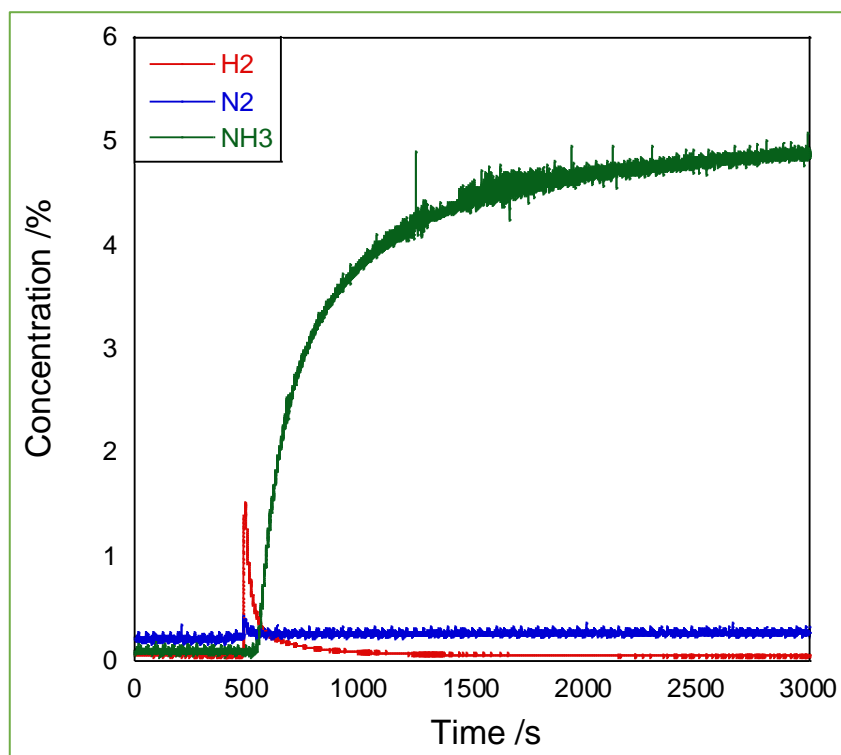

Fig. S15  $\text{NH}_3$  decomposition at room temperature measured by Q-MASS.

The exit gas from the ammonia inflow to 8.2 mol% Ru/CeO<sub>2</sub> at room temperature was analyzed by Q-MASS. The formation of H<sub>2</sub> and N<sub>2</sub> was confirmed immediately after the inflow of ammonia gas. The H<sub>2</sub>:N<sub>2</sub> ratio was 4:1, indicating that the amount of H<sub>2</sub> was higher. It is thought that N was adsorbed on the catalyst surface and could not be desorbed. Thereafter, NH<sub>3</sub> decomposition did not proceed. This is thought to be due to the adsorbed N covering the catalyst surface. Therefore, it can

be said that the dehydrogenation reaction of ammonia is easy to occur at low temperatures, but the desorption of nitrogen is difficult to proceed.

Table S1. Physicochemical properties of Ru/CeO<sub>2</sub>.

| catalyst                    | catalyst calcination temperature<br>K | specific surface area<br>m <sup>2</sup> g <sup>-1</sup> | Ru particle size<br>nm | metal dispersion<br>% |
|-----------------------------|---------------------------------------|---------------------------------------------------------|------------------------|-----------------------|
| 0.85mol%Ru/CeO <sub>2</sub> | 723                                   | 139.5                                                   | 3.7                    | 111                   |
| 5.0mol%Ru/CeO <sub>2</sub>  | 573                                   | 150.8                                                   | 4.4                    | 47.7                  |
| 5.0mol%Ru/CeO <sub>2</sub>  | 723                                   | 98.6                                                    | 4.9                    | 45.3                  |
| 8.2mol%Ru/CeO <sub>2</sub>  | 723                                   | 87.9                                                    | 6.1                    | 33.3                  |

Ru particle size and dispersion were derived by TEM and CO pulse measurements. 0.85 mol% Ru/CeO<sub>2</sub> is highly dispersed with very low Ru loading, and the dispersion exceeded 100% probably due to the adsorption of CO on the CeO<sub>2</sub> and physical adsorption.

Table S2 The temperature dependence of NH<sub>3</sub> conversion over 8.2 mol%Ru/CeO<sub>2</sub> catalyst without EF; 100 mg catalyst, 0.1 MPa.

| Catalyst-bed Temperature<br>K | NH <sub>3</sub> conversion<br>% | NH <sub>3</sub> decomposition rate<br>mmol min <sup>-1</sup> |
|-------------------------------|---------------------------------|--------------------------------------------------------------|
| 376.6                         | 0.1                             | 0.000                                                        |
| 476.3                         | 2.7                             | 0.003                                                        |
| 526.7                         | 9.1                             | 0.010                                                        |
| 546.5                         | 13.6                            | 0.015                                                        |
| 576.6                         | 30.5                            | 0.034                                                        |
| 596.7                         | 47.2                            | 0.053                                                        |
| 626.1                         | 73.7                            | 0.082                                                        |
| 651.6                         | 88.0                            | 0.098                                                        |
| 677.2                         | 90.8                            | 0.101                                                        |
| 779.9                         | 95.1                            | 0.106                                                        |
| 729.2                         | 94.1                            | 0.105                                                        |

Table S3 The temperature dependence of NH<sub>3</sub> conversion over 8.2 mol%Ru/CeO<sub>2</sub> catalyst in EF; 100 mg catalyst, 0.1 MPa, 6.0 mA.

| Catalyst-bed Temperature | NH <sub>3</sub> conversion | NH <sub>3</sub> decomposition rate | Response voltage |
|--------------------------|----------------------------|------------------------------------|------------------|
| K                        | %                          | mmol min <sup>-1</sup>             | kV               |
| 367.4                    | 24.5                       | 0.03                               | -0.14            |
| 469.5                    | 23.9                       | 0.02                               | -0.10            |
| 525.7                    | 31.6                       | 0.03                               | -0.11            |
| 570.7                    | 40.7                       | 0.04                               | -0.08            |
| 627.6                    | 65.0                       | 0.07                               | -0.07            |
| 685.0                    | 78.7                       | 0.08                               | -0.05            |

Table S4 The temperature dependence of NH<sub>3</sub> conversion over 8.2 mol%Ni/CeO<sub>2</sub> without EF; 100 mg catalyst, 0.1 MPa.

| Catalyst-bed Temperature | NH <sub>3</sub> conversion | NH <sub>3</sub> decomposition rate |
|--------------------------|----------------------------|------------------------------------|
| K                        | %                          | mmol min <sup>-1</sup>             |
| 370.7                    | 0.2                        | 0.0002                             |
| 597.2                    | 9.2                        | 0.0095                             |
| 679.2                    | 18.3                       | 0.0189                             |
| 770.7                    | 66.2                       | 0.0684                             |
| 883.5                    | 86.9                       | 0.0899                             |

Table S5 The temperature dependence of NH<sub>3</sub> conversion over 8.2 mol%Ni/CeO<sub>2</sub> catalyst with/without EF; 100 mg catalyst, 0.1 MPa, 0 or 6.0 mA.

| Catalyst-bed Temperature | NH <sub>3</sub> conversion | NH <sub>3</sub> decomposition rate | Response voltage |
|--------------------------|----------------------------|------------------------------------|------------------|
| K                        | %                          | mmol min <sup>-1</sup>             | kV               |
| 348.9                    | 17.1                       | 0.02                               | -0.09            |
| 379.9                    | 16.6                       | 0.02                               | -0.09            |
| 429.6                    | 16.7                       | 0.02                               | -0.13            |
| 470.7                    | 13.2                       | 0.01                               | -0.09            |
| 565.9                    | 9.7                        | 0.01                               | -0.06            |
| 669.9                    | 21.6                       | 0.02                               | -0.06            |
| 770.0                    | 69.1                       | 0.07                               | -0.02            |
| 871.6                    | 92.8                       | 0.10                               | 0.00             |

Table S6 The temperature dependence of NH<sub>3</sub> conversion over 8.2 mol%Fe/CeO<sub>2</sub> catalyst without EF; 100 mg catalyst, 0.1 MPa.

| Catalyst-bed Temperature | NH <sub>3</sub> conversion | NH <sub>3</sub> decomposition rate |
|--------------------------|----------------------------|------------------------------------|
| K                        | %                          | mmol min <sup>-1</sup>             |
| 369.6                    | 0.2                        | 0.000                              |
| 477.9                    | 0.5                        | 0.001                              |
| 578.7                    | 1.8                        | 0.003                              |
| 676.2                    | 0.1                        | 0.000                              |
| 774.9                    | 48.3                       | 0.073                              |

Table S7 The temperature dependence of NH<sub>3</sub> conversion over 8.2 mol%Fe/CeO<sub>2</sub> catalyst in EF; 100 mg catalyst, 0.1 MPa, 6.0 mA.

| Catalyst-bed Temperature | NH <sub>3</sub> conversion | NH <sub>3</sub> decomposition rate | Response voltage |
|--------------------------|----------------------------|------------------------------------|------------------|
| K                        | %                          | mmol min <sup>-1</sup>             | kV               |
| 356.0                    | 21.4                       | 0.02                               | -0.11            |
| 378.8                    | 21.1                       | 0.02                               | -0.11            |
| 472.4                    | 21.3                       | 0.02                               | -0.12            |
| 570.2                    | 15.4                       | 0.02                               | -0.10            |
| 668.2                    | 12.9                       | 0.01                               | -0.07            |
| 769.8                    | 49.7                       | 0.05                               | -0.02            |

Table S8 The temperature dependence of NH<sub>3</sub> conversion over 8.2 mol%Co/CeO<sub>2</sub> catalyst without EF; 100 mg catalyst, 0.1 MPa.

| Catalyst-bed Temperature | NH <sub>3</sub> conversion | NH <sub>3</sub> decomposition rate |
|--------------------------|----------------------------|------------------------------------|
| K                        | %                          | mmol min <sup>-1</sup>             |
| 374.6                    | 0.0                        | 0.000                              |
| 471.0                    | 0.0                        | 0.000                              |
| 573.0                    | 1.0                        | 0.001                              |
| 673.0                    | 16.6                       | 0.017                              |
| 772.2                    | 76.0                       | 0.078                              |

Table S9 The temperature dependence of NH<sub>3</sub> conversion over 8.2 mol%Co/CeO<sub>2</sub> catalyst in EF; 100 mg catalyst, 0.1 MPa, 0 or 6.0 mA.

| Catalyst-bed Temperature | NH <sub>3</sub> conversion | NH <sub>3</sub> decomposition rate | Response voltage |
|--------------------------|----------------------------|------------------------------------|------------------|
| K                        | %                          | mmol min <sup>-1</sup>             | kV               |
| 338.1                    | 4.2                        | 0.00                               | -0.06            |
| 373.1                    | 5.6                        | 0.01                               | -0.06            |
| 471.1                    | 4.7                        | 0.00                               | -0.06            |
| 573.1                    | 3.2                        | 0.00                               | -0.05            |
| 669.5                    | 13.3                       | 0.01                               | -0.02            |
| 770.0                    | 69.4                       | 0.07                               | 0.00             |

Table S10. The temperature dependence of NH<sub>3</sub> conversion over CeO<sub>2</sub> catalyst in EF; 100 mg catalyst, 0.1 MPa, 6.0 mA.

| Catalyst-bed Temperature | NH <sub>3</sub> conversion | NH <sub>3</sub> decomposition rate | Response voltage |
|--------------------------|----------------------------|------------------------------------|------------------|
| K                        | %                          | mmol/min                           | kV               |
| 372.2                    | 6.4                        | 0.007                              | -0.08            |
| 422.1                    | 6.7                        | 0.007                              | -0.08            |
| 472.3                    | 6.5                        | 0.007                              | -0.08            |
| 521.2                    | 2.8                        | 0.003                              | -0.07            |
| 571.7                    | 0.1                        | 0.000                              | -0.06            |
| 622.6                    | 0.2                        | 0.000                              | -0.05            |
| 672.6                    | 0.4                        | 0.000                              | -0.03            |
| 723.1                    | 1.0                        | 0.001                              | -0.02            |

The low activity of CeO<sub>2</sub> only indicates that an active metal is required for the ammonia decomposition reaction. Due to the presence of protons on CeO<sub>2</sub>, it is slightly active in the low temperature range of the electric field reaction, but not the main activity.

Table S11. Physicochemical properties of 8.2 mol% Ru/CeO<sub>2</sub> structure before and after the electric field test. 5%NH<sub>3</sub>/Ar = 50 SCCM, 100 mg cat, 0.1 MPa, 6.0 mA.

| catalyst state | specific surface area          | Ru particle size | metal dispersion | Crystallite size       |                        |                        |                        |
|----------------|--------------------------------|------------------|------------------|------------------------|------------------------|------------------------|------------------------|
|                |                                |                  |                  | CeO <sub>2</sub> (200) | CeO <sub>2</sub> (311) | CeO <sub>2</sub> (222) | CeO <sub>2</sub> (422) |
|                | m <sup>2</sup> g <sup>-1</sup> | nm               | %                | Å                      | Å                      | Å                      | Å                      |
| Before EF test | 108.6                          | 6.5              | 29.4             | 103.6                  | 80.3                   | 64.7                   | 76.2                   |
| After EF test  | 88.4                           | 6.2              | 27.1             | 99.0                   | 83.6                   | 67.3                   | 78.9                   |

Ru particle size and Ru dispersion were derived by TEM and CO pulse measurements.

Table S12 Data for Arrhenius plots on NH<sub>3</sub> decomposition rates over 0.85 mol%Ru/CeO<sub>2</sub> catalyst without EF.

| Catalyst-bed Temperature | NH <sub>3</sub> conversion | NH <sub>3</sub> decomposition rate | 1/T                              | Lnr                                      |
|--------------------------|----------------------------|------------------------------------|----------------------------------|------------------------------------------|
| K                        | %                          | mmol min <sup>-1</sup>             | 10 <sup>-3</sup> K <sup>-1</sup> | (mol g <sup>-1</sup> h <sup>-1</sup> )/- |
| 572.9                    | 2.2                        | 0.01                               | 1.7                              | 8.6                                      |
| 475.2                    | 0.1                        | 0.00                               | 2.1                              | 5.7                                      |
| 619.0                    | 9.7                        | 0.02                               | 1.6                              | 10.1                                     |
| 670.6                    | 29.9                       | 0.08                               | 1.5                              | 11.2                                     |
| 717.6                    | 55.7                       | 0.14                               | 1.4                              | 11.9                                     |

Table S13 Data for Arrhenius plots on NH<sub>3</sub> decomposition rates over 0.85 mol%Ru/CeO<sub>2</sub> catalyst in EF.

| Catalyst-bed Temperature | NH <sub>3</sub> conversion | NH <sub>3</sub> decomposition rate | Response voltage | 1/T                              | Lnr                                      |
|--------------------------|----------------------------|------------------------------------|------------------|----------------------------------|------------------------------------------|
| K                        | %                          | mmol min <sup>-1</sup>             | kV               | 10 <sup>-3</sup> K <sup>-1</sup> | (mol g <sup>-1</sup> h <sup>-1</sup> )/- |
| 346.7                    | 9.3                        | 0.04                               | -0.18            | 2.9                              | 2.4                                      |
| 353.1                    | 10.2                       | 0.04                               | -0.18            | 2.8                              | 2.5                                      |
| 364.0                    | 11.0                       | 0.05                               | -0.19            | 2.7                              | 2.6                                      |
| 373.0                    | 11.0                       | 0.05                               | -0.19            | 2.7                              | 2.6                                      |
| 383.5                    | 10.1                       | 0.04                               | -0.18            | 2.6                              | 2.5                                      |
| 394.0                    | 10.3                       | 0.04                               | -0.18            | 2.5                              | 2.5                                      |
| 426.7                    | 7.5                        | 0.03                               | -0.12            | 2.3                              | 2.2                                      |
| 469.0                    | 7.6                        | 0.03                               | -0.11            | 2.1                              | 2.2                                      |
| 568.4                    | 16.1                       | 0.07                               | -0.10            | 1.8                              | 3.0                                      |
| 619.4                    | 30.7                       | 0.13                               | -0.10            | 1.6                              | 3.6                                      |
| 663.8                    | 60.6                       | 0.25                               | -0.07            | 1.5                              | 4.3                                      |

Table S14. Data used for TOF calculation.

| Metal (Ru) loading amount | Catalyst calcination temperature | Ru particle size | NH <sub>3</sub> conversion |                    |
|---------------------------|----------------------------------|------------------|----------------------------|--------------------|
|                           |                                  |                  | with EF (473 K)            | without EF (573 K) |
| mol%                      | K                                | nm               | %                          | %                  |
| 0.85                      | 723                              | 3.7              | 6.1                        | 5.4                |
| 5.0                       | 573                              | 4.4              | 17.8                       | 29.2               |
| 5.0                       | 723                              | 4.9              | 20.1                       | 23.3               |
| 8.2                       | 723                              | 6.1              | 20.8                       | 29.8               |

Ru particle size was derived by TEM measurements.

Table S15. Low-temperature adsorbed species trap test. 5%NH<sub>3</sub>/Ar = 50 SCCM, 300 mg 8.2 mol% Ru/CeO<sub>2</sub>, 0.1 MPa, 0 or 6.0 mA.

|            | Catalyst-bed<br>Temperature<br>K | NH <sub>3</sub><br>conversion<br>% | NH <sub>3</sub><br>decomposition rate<br>mmol/min | Response<br>voltage<br>kV | Desorption at 493 K<br>H <sub>2</sub> /N <sub>2</sub> ratio<br>- |
|------------|----------------------------------|------------------------------------|---------------------------------------------------|---------------------------|------------------------------------------------------------------|
| without EF | 572.8                            | 45.1                               | 0.046                                             | 0                         | 0.47                                                             |
| with EF    | 366.7                            | 44.3                               | 0.045                                             | -0.22                     | 1.43                                                             |

Table S16 Reaction enthalpy and activation energy of each reaction step.

| Mechanism                                | Reaction step               | N-terminate     |                 | H-terminate     |                 |
|------------------------------------------|-----------------------------|-----------------|-----------------|-----------------|-----------------|
|                                          |                             | Metal           | Interface       | Metal           | Interface       |
| *N formation                             | *NH + *NH → *NH + *N + *H   | 0.42<br>(1.37)  | -0.27<br>(0.00) | 0.35<br>(1.33)  | -0.03<br>(0.00) |
|                                          | *NH + *N + *H → 2 *N + 2 *H | -0.49<br>(0.42) | -1.25<br>(0.83) | -0.63<br>(0.31) | -0.76<br>(0.82) |
|                                          | 2 *N + 2 *H → *NN + 2 *H    | 0.82<br>(1.88)  | 1.80<br>(2.83)  | 0.77<br>(1.87)  | 1.41<br>(2.42)  |
| *N <sub>2</sub> H <sub>2</sub> formation | *NH + *NH → *NHNH           | 1.08<br>(1.41)  | 1.33<br>(1.52)  | 0.89<br>(1.26)  | 0.87<br>(1.35)  |
|                                          | *NHNH → *NNH + *H           | -0.17<br>(1.25) | -0.41<br>(0.18) | -0.16<br>(1.12) | -0.22<br>(0.27) |
|                                          | *NNH + *H → *NN + 2 *H      | -0.15<br>(0.75) | -0.10<br>(1.16) | -0.24<br>(0.73) | -0.12<br>(1.11) |

Numbers in ( ) indicate the activation energy.

Table S17 Results of AC impedance measurements.

| Condition                | Temp.<br>K | R<br>10 <sup>8</sup> W | C<br>10 <sup>-10</sup> F | s<br>10 <sup>-10</sup> S cm <sup>-1</sup> | e<br>10 <sup>-11</sup> F cm <sup>-1</sup> | e <sub>r</sub><br>10 <sup>2</sup> |
|--------------------------|------------|------------------------|--------------------------|-------------------------------------------|-------------------------------------------|-----------------------------------|
| Ar only                  | 472.6      | 22                     | 2.2                      | 0.46                                      | 2.2                                       | 2.5                               |
| 4.98%NH <sub>3</sub> /Ar | 472.8      | 1.0                    | 2.0                      | 9.8                                       | 2.1                                       | 2.3                               |
| 5%H <sub>2</sub> /Ar     | 473.3      | 0.21                   | 2.3                      | 47                                        | 2.3                                       | 2.6                               |
